# Supplementary material
Source: MDPI journal article supplement (https://www.mdpi.com/2073-4441/13/23/3396)
Supplement: s1 [file s1]

# HCH Removal in a Biochar-Amended Biofilter

Aday Amirbekov 1,2, Aigerim Mamirova 3, Alena Sevcu 1,4, Roman Spanek 1 and Pavel Hrabak 1,2,\*1

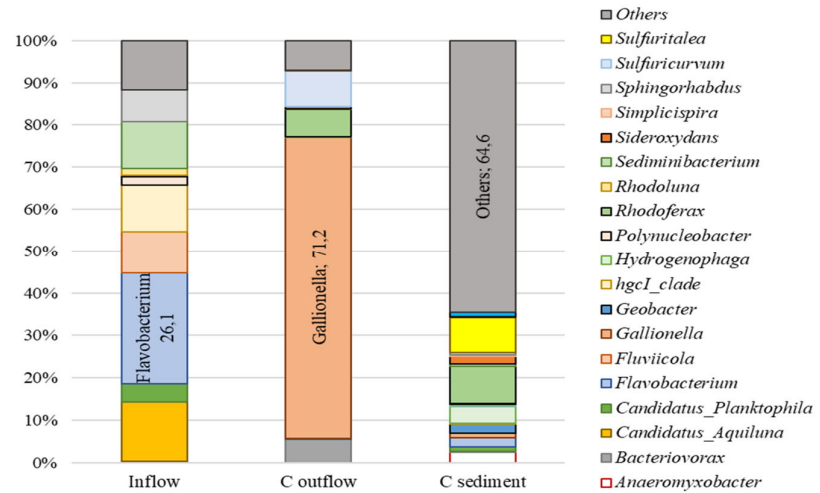

**Figure S1.** Relative representation of microorganisms at family level (abundance > 5 %) in the control biofilter C inflow, C outflow and C sediment samples in September 26<sup>th</sup> 2018.

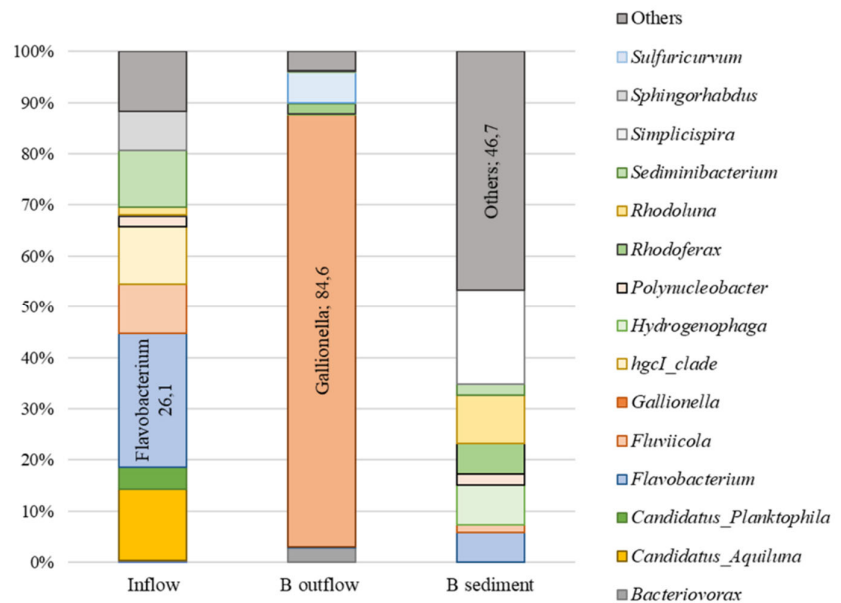

**Figure S2.** Relative representation of microorganisms at family level (abundance > 5 %) in the biochar biofilter B inflow, B outflow and B sediment samples in September 26<sup>th</sup> 2018.

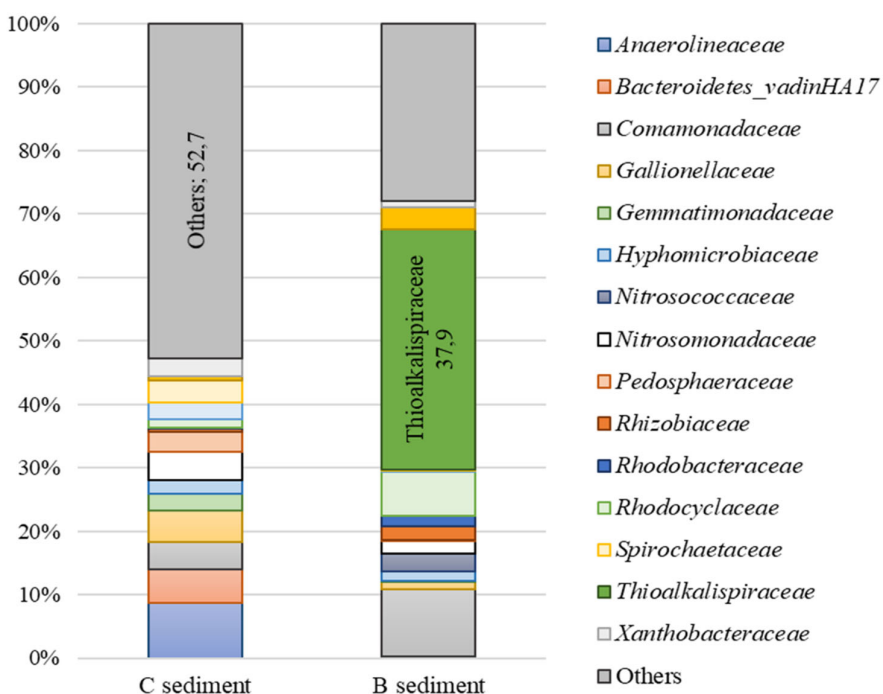

**Figure S3.** Relative representation of microorganisms at family level (abundance > 2 %) in the sediment samples of control biofilter C and biochar biofilter B in November 1<sup>st</sup> 2019.

**Table S1.** Concentration of HCH isomers during experiment (LOQ < 0.01 µg L<sup>-1</sup>).

| Month           |        | HCH isomers concentration, µg L <sup>-1</sup> |       |       |       |       |
|-----------------|--------|-----------------------------------------------|-------|-------|-------|-------|
|                 |        | α-HCH                                         | β-HCH | γ-HCH | δ-HCH | ε-HCH |
| August, 2018    | Inflow | 14.0                                          | 2.8   | 15.1  | 118.3 | 15.5  |
|                 | C      | 7.8                                           | 1.5   | 8.9   | 67.3  | 12.4  |
|                 | B      | 3.6                                           | 0.8   | 3.9   | 26.4  | 4.1   |
| September, 2018 | Inflow | 10.3                                          | 2.2   | 8.5   | 122.2 | 13.2  |
|                 | C      | 1.2                                           | 1.5   | 1.3   | 23.6  | 12.5  |
|                 | B      | < LOQ                                         | 0.2   | < LOQ | 1.0   | 1.1   |
| October, 2018   | Inflow | 7.4                                           | 1.6   | 3.8   | 131.0 | 12.3  |
|                 | C      | 0.4                                           | 1.2   | 0.5   | 14.9  | 10.8  |
|                 | B      | < LOQ                                         | < LOQ | < LOQ | 1.2   | 1.0   |
| November, 2018  | Inflow | 7.5                                           | 3.6   | 4.7   | 110.4 | 14.3  |
|                 | C      | 0.9                                           | 2.1   | 0.7   | 16.7  | 11.6  |
|                 | B      | 0.0                                           | < LOQ | 0.0   | 1.7   | 1.3   |

|                |        |       |       |       |       |      |
|----------------|--------|-------|-------|-------|-------|------|
| December, 2018 | Inflow | 5.2   | 1.4   | 2.1   | 79.8  | 12.4 |
|                | C      | 1.5   | 1.4   | 1.3   | 32.0  | 11.1 |
|                | B      | < LOQ | 0.2   | < LOQ | 1.9   | 1.1  |
| January, 2019  | Inflow | 4.5   | 1.9   | 3.0   | 51.3  | 8.2  |
|                | C      | 1.1   | 1.3   | 1.0   | 22.6  | 8.0  |
|                | B      | < LOQ | < LOQ | < LOQ | 0.4   | 0.6  |
| February, 2019 | Inflow | 8.6   | 2.6   | 6.3   | 117.7 | 14.3 |
|                | C      | 2.2   | 1.7   | 2.4   | 44.9  | 11.7 |
|                | B      | < LOQ | 0.3   | 0.1   | 1.5   | 0.7  |
| March, 2019    | Inflow | 10.9  | 4.4   | 8.4   | 74.1  | 11.5 |
|                | C      | 0.7   | 1.7   | 0.8   | 14.6  | 8.8  |
|                | B      | 0.0   | < LOQ | < LOQ | 1.2   | 1.0  |
| April, 2019    | Inflow | 8.1   | 2.4   | 7.4   | 76.1  | 10.1 |
|                | C      | 0.4   | 1.1   | 0.4   | 9.9   | 8.1  |
|                | B      | < LOQ | 0.2   | 0.1   | 0.7   | 1.0  |
| May, 2019      | Inflow | 9.8   | 2.0   | 9.6   | 84.9  | 13.2 |
|                | C      | 6.1   | 1.4   | 6.5   | 53.4  | 11.3 |
|                | B      | 1.7   | 0.9   | 1.5   | 16.5  | 3.9  |

**Table S2.** Concentration of Chlorobenzenes (CLBs) during experiment.

| Month           |        | Chlorobenzenes' concentration, µg L <sup>-1</sup> |       |           |           |           |              |              |              |                          |                  |           |
|-----------------|--------|---------------------------------------------------|-------|-----------|-----------|-----------|--------------|--------------|--------------|--------------------------|------------------|-----------|
|                 |        | Benzen                                            | CIB   | 1.3-diCLB | 1.4-diCLB | 1.2-diCLB | 1.3.5-triCLB | 1.2.4-triCLB | 1.2.3-triCLB | 1.2.4.5+1.2.3.5-tetraCLB | 1.2.3.4-tetraCLB | penta-CLB |
|                 | LOQ    | < 1                                               | < 0.2 | < 0.005   | < 0.005   | < 0.005   | < 0.005      | < 0.005      | < 0.005      | < 0.015                  | < 0.01           | < 0.015   |
| August, 2018    | Inflow | 4.8                                               | 268.0 | 57.9      | 260.7     | 62.7      | 9.2          | 43.2         | 18.5         | 0.6                      | 0.4              | < LOQ     |
|                 | C      | < LOQ                                             | 1.3   | 26.9      | 128.6     | 27.1      | 3.9          | 19.1         | 8.0          | 0.3                      | 0.2              | < LOQ     |
|                 | B      | < LOQ                                             | 9.2   | 10.7      | 37.3      | 11.8      | 1.9          | 9.8          | 3.0          | 0.1                      | 0.1              | < LOQ     |
| September, 2018 | Inflow | < LOQ                                             | 23.2  | 129.3     | 120.5     | 102.6     | 19.2         | 139.1        | 17.2         | 2.9                      | 1.7              | 0.4       |
|                 | C      | < LOQ                                             | < LOQ | 33.5      | 20.2      | 8.9       | 13.8         | 9.6          | 11.2         | 0.3                      | 0.6              | < LOQ     |
|                 | B      | < LOQ                                             | < LOQ | 0.6       | 0.6       | 1.6       | < LOQ        | 6.4          | 2.1          | < LOQ                    | < LOQ            | < LOQ     |
| October, 2018   | Inflow | 1.0                                               | 143.0 | 168.4     | 415.0     | 81.4      | 41.6         | 70.9         | 4.6          | 9.6                      | 2.8              | 2.3       |
|                 | C      | < LOQ                                             | < LOQ | 22.8      | 14.6      | 2.3       | 17.7         | 1.4          | 2.2          | 0.5                      | 0.8              | 0.6       |
|                 | B      | < LOQ                                             | < LOQ | 0.4       | 0.6       | 1.1       | 0.2          | < LOQ        | 0.4          | < LOQ                    | < LOQ            | < LOQ     |
| November, 2018  | Inflow | < LOQ                                             | < LOQ | 328.1     | < LOQ     | 75.3      | 50.9         | 114.0        | 3.2          | 10.2                     | 3.9              | 4.1       |
|                 | C      | < LOQ                                             | < LOQ | 92.2      | 1.3       | 3.6       | 30.1         | 7.6          | 2.1          | 0.9                      | 1.5              | 1.2       |
|                 | B      | < LOQ                                             | < LOQ | 0.4       | 0.5       | 3.6       | 0.2          | 2.5          | 0.4          | < LOQ                    | 0.0              | 0.1       |
| December, 2018  | Inflow | < LOQ                                             | 101.0 | 44.5      | 170.7     | 35.2      | 5.0          | 37.8         | 0.4          | 0.6                      | 0.3              | < LOQ     |
|                 | C      | < LOQ                                             | < LOQ | 21.0      | 2.3       | 1.6       | 4.6          | 2.2          | 0.4          | < LOQ                    | 0.2              | < LOQ     |
|                 | B      | < LOQ                                             | < LOQ | 0.1       | < LOQ     | 0.6       | 0.1          | 0.4          | 0.1          | < LOQ                    | < LOQ            | < LOQ     |
| January, 2019   | Inflow | < LOQ                                             | 25.0  | 87.2      | 313.4     | 45.1      | 16.3         | 64.1         | 2.8          | 1.6                      | 2.1              | 0.4       |
|                 | C      | < LOQ                                             | < LOQ | 21.6      | 8.5       | 3.2       | 8.9          | 6.7          | 1.3          | < LOQ                    | 0.7              | 0.3       |
|                 | B      | < LOQ                                             | < LOQ | 0.1       | < LOQ     | 0.2       | 0.2          | 2.5          | < LOQ        | < LOQ                    | < LOQ            | < LOQ     |
| February, 2019  | Inflow | < LOQ                                             | 93.0  | 55.0      | 251.5     | 45.3      | 6.9          | 36.9         | 4.0          | 0.4                      | 0.7              | < LOQ     |
|                 | C      | < LOQ                                             | < LOQ | 19.3      | 6.8       | 7.2       | 3.1          | 9.5          | 1.2          | 0.1                      | 0.4              | < LOQ     |
|                 | B      | < LOQ                                             | < LOQ | 0.2       | 0.4       | 1.0       | 0.2          | 4.8          | < LOQ        | < LOQ                    | < LOQ            | < LOQ     |
| March, 2019     | Inflow | 3.0                                               | 136.0 | 32.8      | 111.1     | 27.0      | 3.7          | 37.4         | 3.2          | 0.5                      | 0.8              | < LOQ     |



[illegible]
